# Supplementary material for: Orientational isomerisation of guest molecules in equilibrium in a tubular host crystal formed via halogen and hydrogen bonding
Source: Royal Society of Chemistry journal article supplement (doi:10.1039/d1ce01654g), 2022-01-01
Supplement: d1ce01654g1.pdf [file d1ce01654g1.pdf]

## Electronic Supplementary Information (ESI)

# Orientational isomerisation of guest molecules in equilibrium in a tubular host crystal formed *via* halogen and hydrogen bonding

Yutaro Yamashita,<sup>a</sup> Shohei Tashiro<sup>\*a</sup> and Mitsuhiko Shionoya<sup>\*a</sup>

<sup>a</sup>Department of Chemistry, Graduate School of Science, The University of Tokyo, 7-3-1 Hongo, Bunkyo-ku, Tokyo 113-0033, Japan

### Table of contents

|                                                                |           |
|----------------------------------------------------------------|-----------|
| <b>S1. Materials and methods</b> .....                         | <b>2</b>  |
| <b>S2. Synthesis and crystallisation</b> .....                 | <b>2</b>  |
| <b>S3. VT-SCXRD analysis</b> .....                             | <b>12</b> |
| (BBMP·HBr) <sub>2</sub> ⊃CH <sub>2</sub> Cl <sub>2</sub> ..... | 12        |
| BBMP·HBr⊃CD <sub>2</sub> Cl <sub>2</sub> .....                 | 17        |
| BBMP·HBr⊃CH <sub>2</sub> Br <sub>2</sub> .....                 | 20        |
| <b>S4. References</b> .....                                    | <b>21</b> |

## S1. Materials and methods

Solvents and reagents were purchased from TCI Co., Ltd., Kanto chemical Co., Inc. and FUJIFILM Wako Pure Chemical Corporation. All the chemicals were used without further purification. Compound **1** was synthesised in a reported procedure and the  $^1\text{H}$  NMR signals were consistent with the data.<sup>1</sup> BBMP·HBr was synthesised in a modified procedure from the reported ones.<sup>2,3</sup>

Powder X-ray diffraction (PXRD) was recorded on a Rigaku Miniflex 600 diffractometer using  $\text{CuK}\alpha$  radiation. Single-crystal X-ray diffraction (SCXRD) analyses were carried out using a Rigaku XtaLAB P200 diffractometer equipped with a low-temperature  $\text{N}_2$  gas spray cooler, and the obtained data were processed using the CrysAlisPro platform and analysed using the Olex-2 crystallographic software package except for refinement<sup>4</sup> using SHELXL.<sup>5</sup> ORTEP diagrams, unit cell structures and overlays of SCXRD structures were displayed using a Mercury software. Packing structures were visualised by a PyMOL software. Electron density maps were made with a ShelXle program.<sup>6</sup> The nuclear magnetic resonance (NMR) spectra were measured using a Bruker AVANCE 500 spectrometer.  $^1\text{H}$  NMR spectra were calibrated as TMS = 0 ppm.

## S2. Synthesis and crystallisation

### Synthesis of 3,5-bis(bromomethyl)pyridine hydrobromide (BBMP·HBr)<sup>2,3</sup>

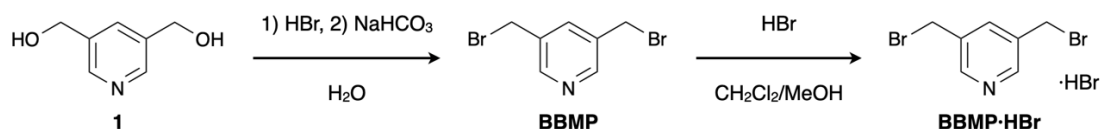

Pyridine-3,5-diyldimethanol<sup>1</sup> (**1**, 152.6 mg, 1.097 mmol) was heated at reflux in 48% hydrobromic acid (5 mL) for 6 h. To the brown solution was added 20 mL of water, and it was basified with a saturated aqueous solution of NaHCO<sub>3</sub> (50 mL). The solution was extracted with CH<sub>2</sub>Cl<sub>2</sub> (40 mL  $\times$  3) and the combined organic layer was dried over Na<sub>2</sub>SO<sub>4</sub>. The obtained solid after evaporation was suspended in CH<sub>2</sub>Cl<sub>2</sub> (100 mL) and then filtered to give a colourless solution. HBr-CH<sub>3</sub>OH reagent (5–10%, 5 mL) was added to the solution to make the HBr salt of BBMP. The beige solid was obtained by evaporation (288.9 mg). A part of the solid (247.9 mg) was recrystallised by the vapor diffusion of diethyl ether into CHCl<sub>3</sub> to afford colourless needle crystals (**II**, 168.9 mg, 0.6375 mmol, 52%).

$^1\text{H}$  NMR (500 MHz, CDCl<sub>3</sub>, 300 K):  $\delta$  = 4.59 (s, 4H), 8.45 (br, 1H), 8.78 (br, 2H).

Elemental analysis: calcd for BBMP·HBr = C<sub>7</sub>H<sub>8</sub>Br<sub>3</sub>N: C 24.31%, H 2.34%, N 4.05%; found C 24.64%, H 2.44%, N 4.20%.

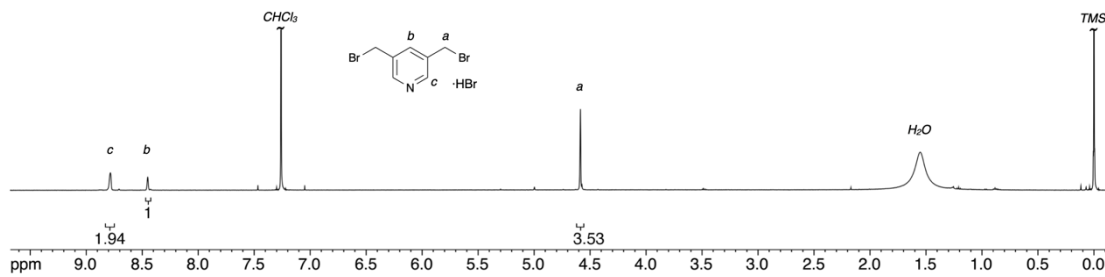

**Fig. S1**  $^1\text{H}$  NMR spectrum ( $\text{CDCl}_3$ , 500 MHz, 300 K) of BBMP·HBr.

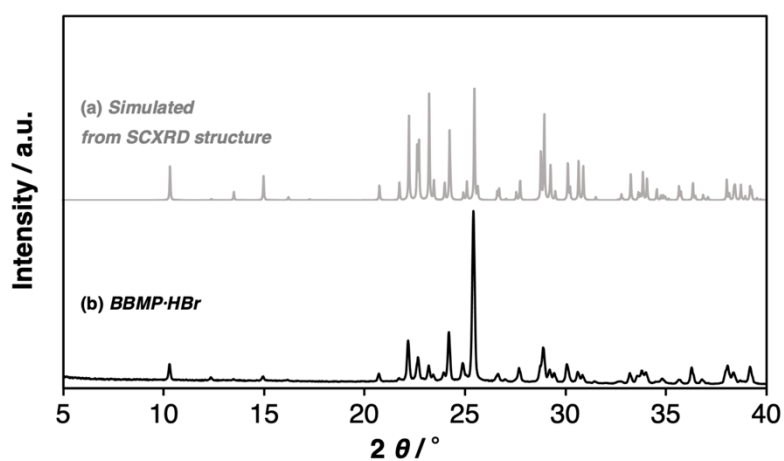

**Fig. S2** PXRD patterns (RT) of BBMP·HBr (a) simulated from the SCXRD structure (CCDC 2125695) and (b) observed.

### Crystals of (BBMP·HBr)<sub>2</sub>·CH<sub>2</sub>Cl<sub>2</sub>

BBMP·HBr (12.2 mg, 35.3 μmol) was dissolved in CH<sub>2</sub>Cl<sub>2</sub> (4 mL) under heating to the boiling point, filtered and left at room temperature. Addition of the seed crystals produced in another batch resulted in the appearance of thin colourless platelets, which were collected by filtration and dried briefly in air to afford (BBMP·HBr)<sub>2</sub>·CH<sub>2</sub>Cl<sub>2</sub> (5.76 mg, 14.8 μmol, 42%). In the absence of seed crystals, only a small amount was formed, and the selectivity of the structure **I** vs. **II** was not high. NMR and PXRD measurements were conducted immediately after filtration to avoid evaporation of the clathrated CH<sub>2</sub>Cl<sub>2</sub>. Crystals of (BBMP·HBr)<sub>2</sub>·CD<sub>2</sub>Cl<sub>2</sub> were synthesised in the same procedure as (BBMP·HBr)<sub>2</sub>·CH<sub>2</sub>Cl<sub>2</sub>.

<sup>1</sup>H NMR (500 MHz, CDCl<sub>3</sub>, 300 K): δ = 4.60 (s, 4H), 5.30 (s, CH<sub>2</sub>Cl<sub>2</sub>, 1H), 8.47 (s, 1H), 8.81 (d, *J* = 2 Hz, 2H).

Elemental analysis: calcd for BBMP·0.94HBr = C<sub>7</sub>H<sub>7.94</sub>Br<sub>2.94</sub>N: C 24.65%, H 2.35%, N 4.11%; found C 24.91%, H 2.53%, N 4.24%.

The composition of BBMP·0.94HBr calculated from the elemental analysis was different from the expected BBMP·HBr·0.5(CH<sub>2</sub>Cl<sub>2</sub>). This may be due to the release of CH<sub>2</sub>Cl<sub>2</sub> and HBr from the dried crystals with time (one day) or during the analytical procedure.

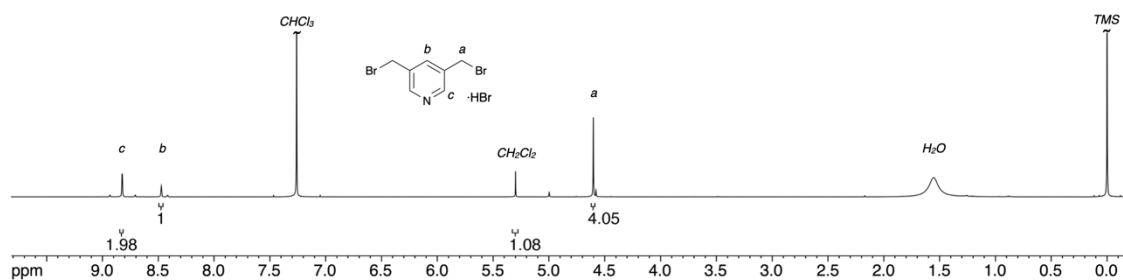

**Fig. S3** <sup>1</sup>H NMR spectrum (CDCl<sub>3</sub>, 500 MHz, 300 K) of (BBMP·HBr)<sub>2</sub>·CH<sub>2</sub>Cl<sub>2</sub>.

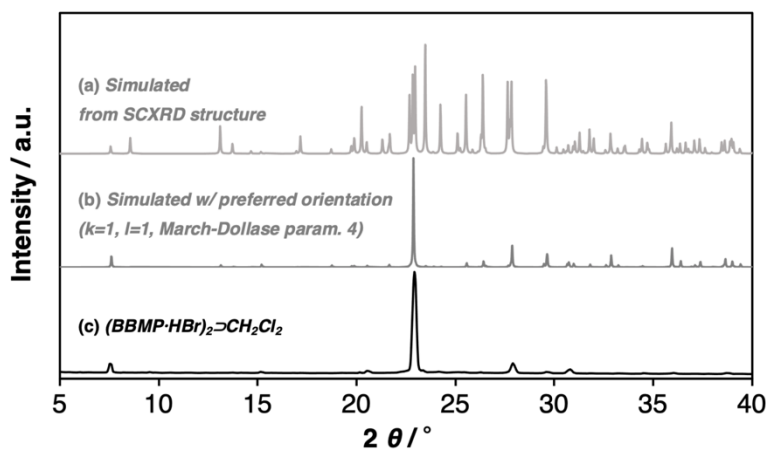

**Fig. S4** PXRD patterns (RT) of  $(\text{BBMP}\cdot\text{HBr})_2\supset\text{CH}_2\text{Cl}_2$  (a) simulated from the SCXRD structure (CCDC 2124417), (b) (a) with a preferred orientation ( $k = 1$ ,  $l = 1$ , March-Dollase parameter 4) and (c) observed.

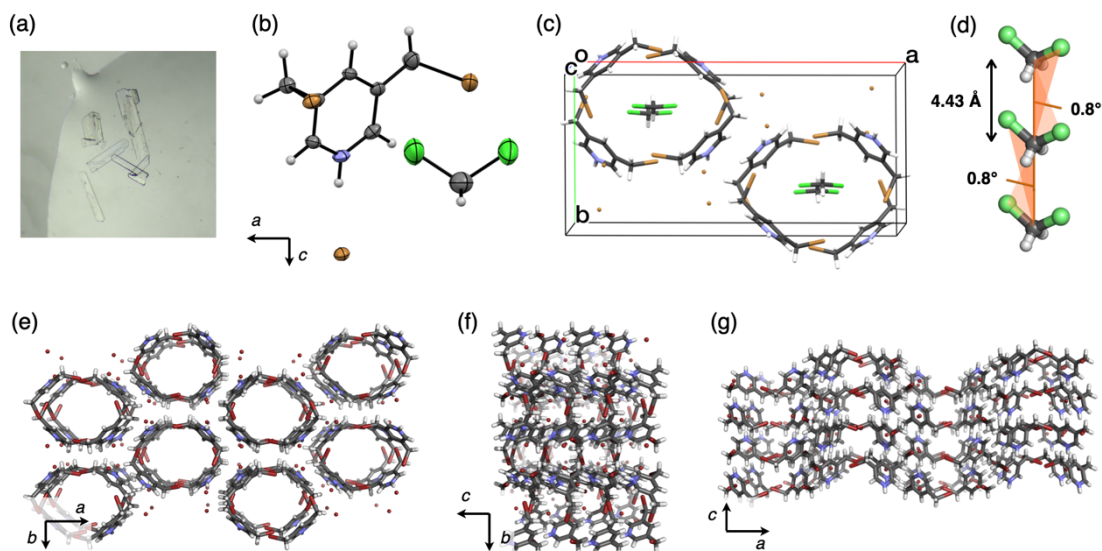

**Fig. S5** (a) Photograph of the  $(\text{BBMP}\cdot\text{HBr})_2\supset\text{CH}_2\text{Cl}_2$  crystals. (b–g) Crystal structure of  $(\text{BBMP}\cdot\text{HBr})_2\supset\text{CH}_2\text{Cl}_2$  (**I**, 148 K). (b) ORTEP diagram (50% probability). (c) Unit cell structure. (d) One-dimensional array of the clathrated  $\text{CH}_2\text{Cl}_2$  molecules along the  $c$ -axis. The intermolecular separation and the dihedral angles of the C–Cl bonds between the adjacent  $\text{CH}_2\text{Cl}_2$  molecules are shown. Packing structure viewed along the (e)  $c$ -, (f)  $a$ - and (g)  $b$ -axes. For (e–g), the solvent molecule  $\text{CH}_2\text{Cl}_2$  was omitted for clarity. CCDC 2124428.

### Crystals of (BBMP·HBr)<sub>2</sub>·CH<sub>2</sub>Br<sub>2</sub>

BBMP·HBr (9.20 mg, 26.6 μmol) dissolved in CH<sub>2</sub>Br<sub>2</sub> (< 1 mL) under heating to 50 °C was filtered and left at room temperature. Addition of the seed crystals produced in another batch resulted in the appearance of thin colourless platelets, which were collected by filtration and dried briefly in air to afford (BBMP·HBr)<sub>2</sub>·CH<sub>2</sub>Br<sub>2</sub> (4.21 mg, 9.73 μmol, 37%). In the absence of seed crystals, only a small amount was formed and the selectivity of the structure **I** vs. **II** was not high. NMR and PXRD measurements were conducted immediately after filtration to avoid evaporation of clathrated CH<sub>2</sub>Br<sub>2</sub>. <sup>1</sup>H NMR (500 MHz, CDCl<sub>3</sub>, 300 K): δ = 4.58 (s, 4H), 4.93 (s, CH<sub>2</sub>Br<sub>2</sub>, 1H), 8.46 (s, 1H), 8.77 (d, *J* = 2 Hz, 2H).

Elemental analysis: calcd for BBMP·HBr·0.42CH<sub>2</sub>Br<sub>2</sub> = C<sub>7.4</sub>H<sub>8.8</sub>Br<sub>3.8</sub>N: C 21.27%, H 2.13%, N 3.34%; found C 21.22%, H 2.19%, N 3.43%.

The composition of BBMP·HBr·0.42(CH<sub>2</sub>Br<sub>2</sub>) calculated from elemental analysis was different from the expected BBMP·HBr·0.5(CH<sub>2</sub>Br<sub>2</sub>). This may be due to the release of CH<sub>2</sub>Br<sub>2</sub> from dried crystals with time (2 days) or during the analytical procedure.

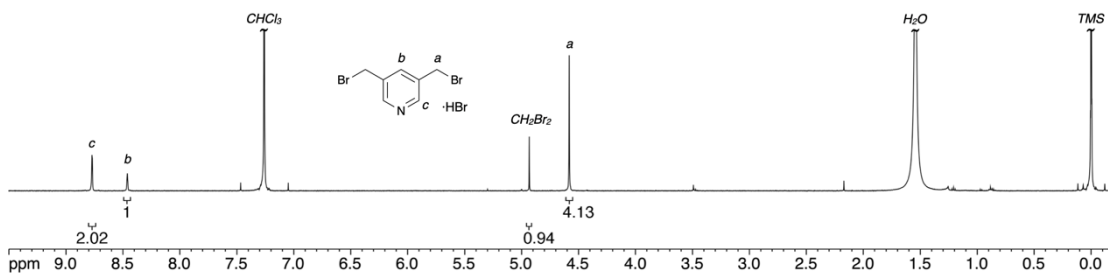

**Fig. S6** <sup>1</sup>H NMR spectrum (CDCl<sub>3</sub>, 500 MHz, 300 K) of (BBMP·HBr)<sub>2</sub>·CH<sub>2</sub>Br<sub>2</sub>.

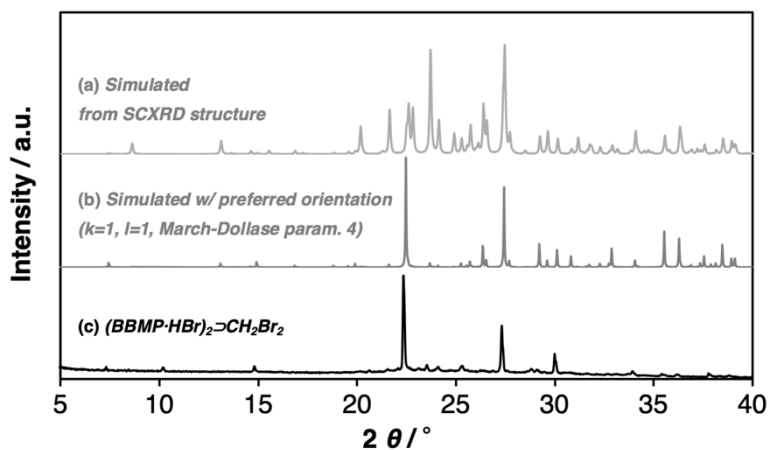

**Fig. S7** PXRD patterns (RT) of (BBMP·HBr)<sub>2</sub>·CH<sub>2</sub>Br<sub>2</sub> (a) simulated from the SCXRD structure (CCDC 2124429), (b) (a) with a preferred orientation (*k* = 1, *l* = 1, March-Dollase parameter 4) and

(c) observed.

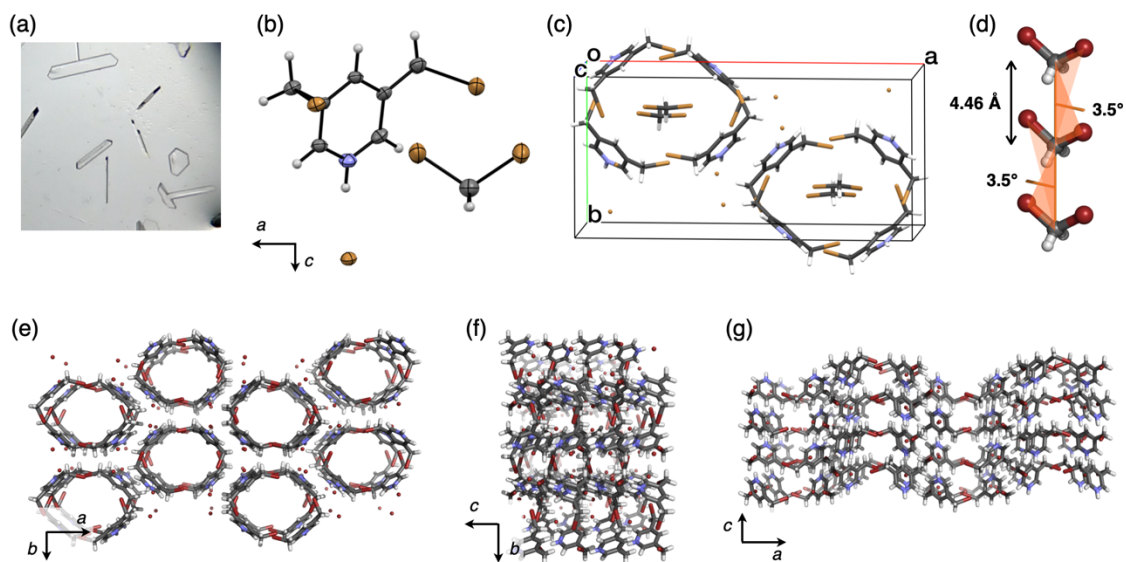

**Fig. S8** Photograph of the  $(\text{BBMP}\cdot\text{HBr})_2\cdot\text{CH}_2\text{Br}_2$  crystals. (b–g) Crystal structure of  $(\text{BBMP}\cdot\text{HBr})_2\cdot\text{CH}_2\text{Br}_2$  (**I**, 148 K). (b) ORTEP diagram (50% probability). (c) Unit cell structure. (d) One-dimensional array of the clathrated  $\text{CH}_2\text{Br}_2$  molecules along the  $c$ -axis. The intermolecular separation and the dihedral angles of the C–Br bonds between the adjacent  $\text{CH}_2\text{Br}_2$  molecules are shown. Packing structure viewed along the (e)  $c$ -, (f)  $a$ - and (g)  $b$ -axes. For (e–g), the solvent molecule  $\text{CH}_2\text{Br}_2$  was omitted for clarity. CCDC 2124430.

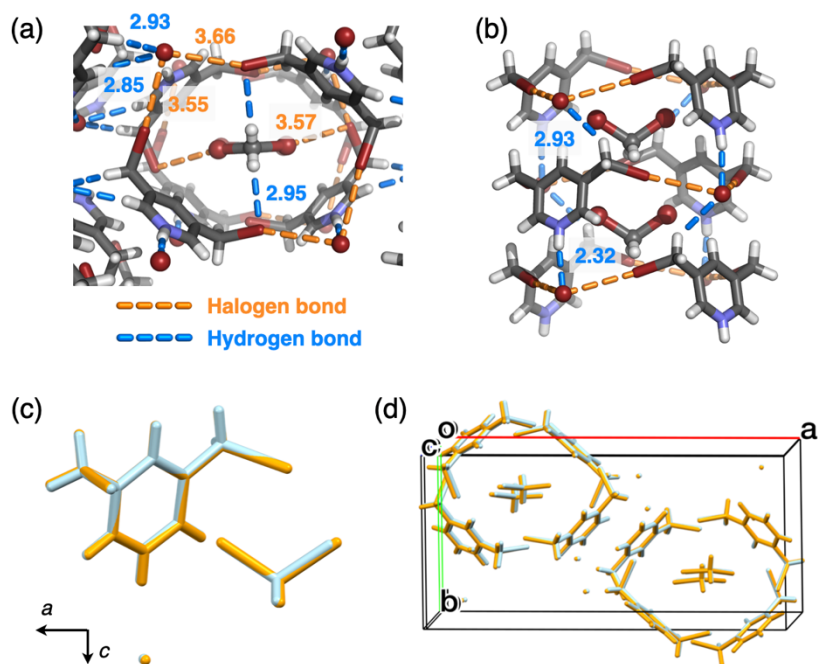

**Fig. S9** Non-covalent bonds seen in the crystal structure of  $(\text{BBMP}\cdot\text{HBr})_2\supset\text{CH}_2\text{Cl}_2$  viewed from (a) top and (b) side of the tube. The orange and blue dashed lines indicate halogen and hydrogen bonds, respectively. (c,d) Overlaid crystal structures of  $(\text{BBMP}\cdot\text{HBr})_2\supset\text{CH}_2\text{Cl}_2$  (cyan) and  $(\text{BBMP}\cdot\text{HBr})_2\supset\text{CH}_2\text{Br}_2$  (orange) at 148 K. (c) Stick model of the molecules. (d) Unit cell structures.



### Non-tube crystals of BBMP·HBr

When BBMP·HBr was crystallised in solvents other than CH<sub>2</sub>Cl<sub>2</sub> and CH<sub>2</sub>Br<sub>2</sub>, crystals with a non-tubular structure without solvent molecules were obtained. Crystal **II** was readily obtained as blocky to plate-like crystals by cooling the CHCl<sub>3</sub> solution of BBMP·HBr or by evaporating the CH<sub>3</sub>CN solution. It was also obtained by rapid quenching or evaporating the CH<sub>2</sub>Cl<sub>2</sub> or CH<sub>2</sub>Br<sub>2</sub> solution. Crystal **III** was obtained only as a minor product of the mixture with crystal **II** by diffusion of diethyl ether into a (CHCl<sub>2</sub>)<sub>2</sub> solution of BBMP·HBr. The crystals subjected to SCXRD was solved as twins.

**Table S1.** Structural parameters for the crystals of BBMP·HBr (**II** and **III**) obtained from the CHCl<sub>3</sub>, CH<sub>3</sub>CN and (CHCl<sub>2</sub>)<sub>2</sub>.

| Solvent                                            | CHCl <sub>3</sub> | CH <sub>3</sub> CN | CH <sub>2</sub> Cl <sub>2</sub> | (CHCl <sub>2</sub> ) <sub>2</sub> /Et <sub>2</sub> O |
|----------------------------------------------------|-------------------|--------------------|---------------------------------|------------------------------------------------------|
| CCDC No.                                           | 2124416           | 2124411            | 2125695                         | 2124418                                              |
| Structure                                          | <b>II</b>         | <b>II</b>          | <b>II</b>                       | <b>III</b>                                           |
| Temperature / K                                    | 93                | 93                 | 293                             | 93                                                   |
| Crystal system                                     | Orthorhombic      | Orthorhombic       | Orthorhombic                    | Monoclinic                                           |
| Space group                                        | <i>Pbca</i>       | <i>Pbca</i>        | <i>Pbca</i>                     | <i>P2<sub>1</sub>/n</i>                              |
| <i>a</i> / Å                                       | 8.1294(2)         | 8.12360(10)        | 8.16082(19)                     | 14.72130(10)                                         |
| <i>b</i> / Å                                       | 14.0393(3)        | 14.0468(2)         | 14.2650(3)                      | 8.57480(10)                                          |
| <i>c</i> / Å                                       | 16.9502(3)        | 16.9496(3)         | 17.0946(4)                      | 23.2614(3)                                           |
| $\beta$ / °                                        | —                 | —                  | —                               | 94.0110(10)                                          |
| <i>V</i> / Å <sup>3</sup>                          | 1934.54(7)        | 1934.13(5)         | 1990.05(8)                      | 2929.15(5)                                           |
| <i>R</i> <sub>int</sub>                            | 0.0240            | 0.0327             | 0.0493                          | — (Twin)                                             |
| <i>R</i> <sub>1</sub> ( <i>I</i> > 2σ( <i>I</i> )) | 0.0275            | 0.0345             | 0.0568                          | 0.0447                                               |
| <i>wR</i> <sub>2</sub> (All data)                  | 0.0728            | 0.0980             | 0.1694                          | 0.1470                                               |
| GOF                                                | 1.115             | 1.107              | 1.100                           | 1.109                                                |

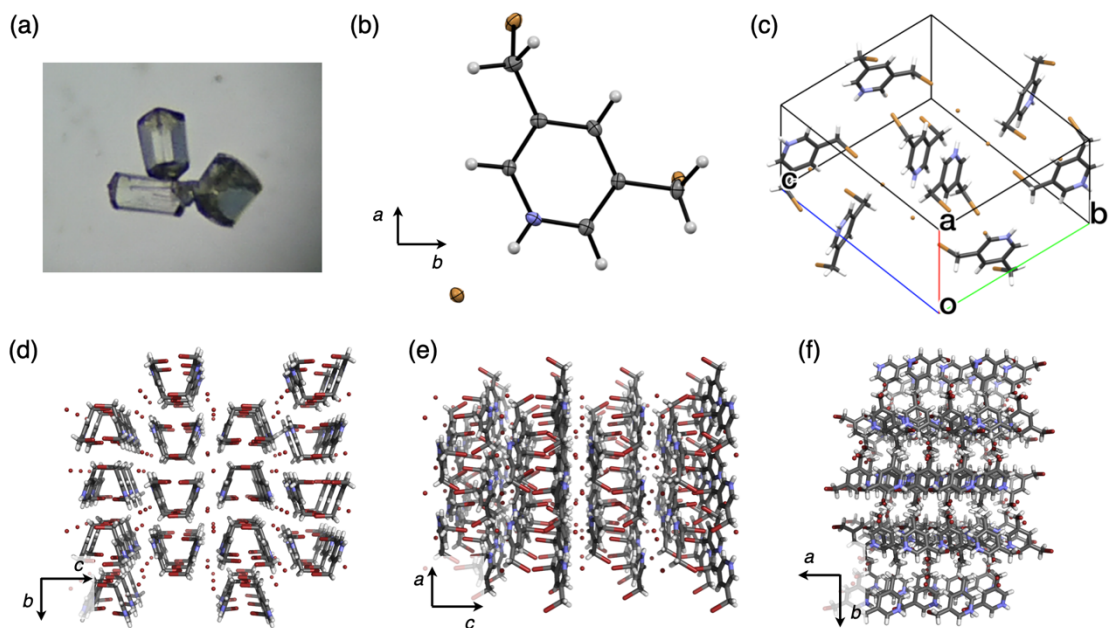

**Fig. S10** (a) Photograph of the BBMP·HBr crystals (**II**). (b–f) Crystal structure of BBMP·HBr (**II**, 93 K) obtained from the  $\text{CHCl}_3$  solution. (b) ORTEP diagram (50% probability). (c) Unit cell structure. Packing structure seen along the (d) *a*-, (e) *b*- and (f) *c*-axes. CCDC 2124416.

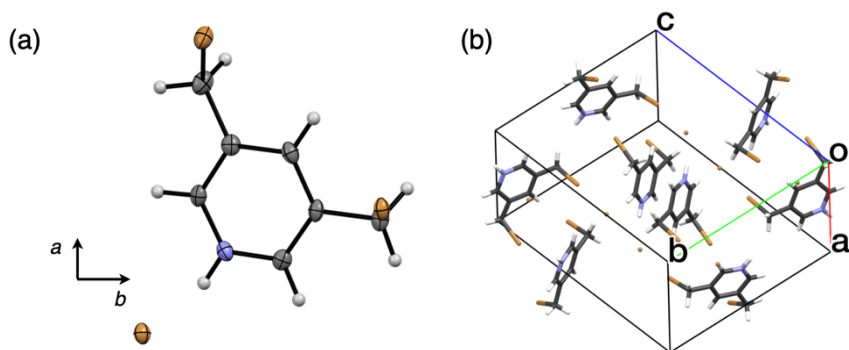

**Fig. S11** Crystal structure of BBMP·HBr (**II**, 93 K) obtained from  $\text{CH}_3\text{CN}$ . (a) ORTEP diagram (50% probability). (b) Unit cell structure. CCDC 2124411.

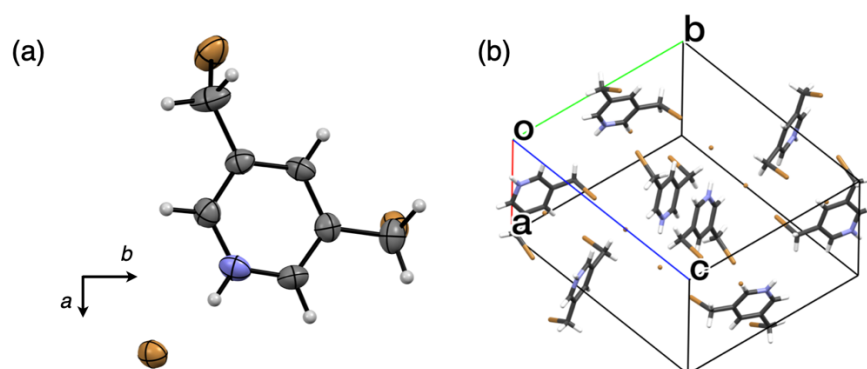

**Fig. S12** Crystal structure of BBMP·HBr (**II**, 293 K) obtained from  $\text{CH}_2\text{Cl}_2$ . (a) ORTEP diagram (50% probability). (b) Unit cell structure. CCDC 2125695.

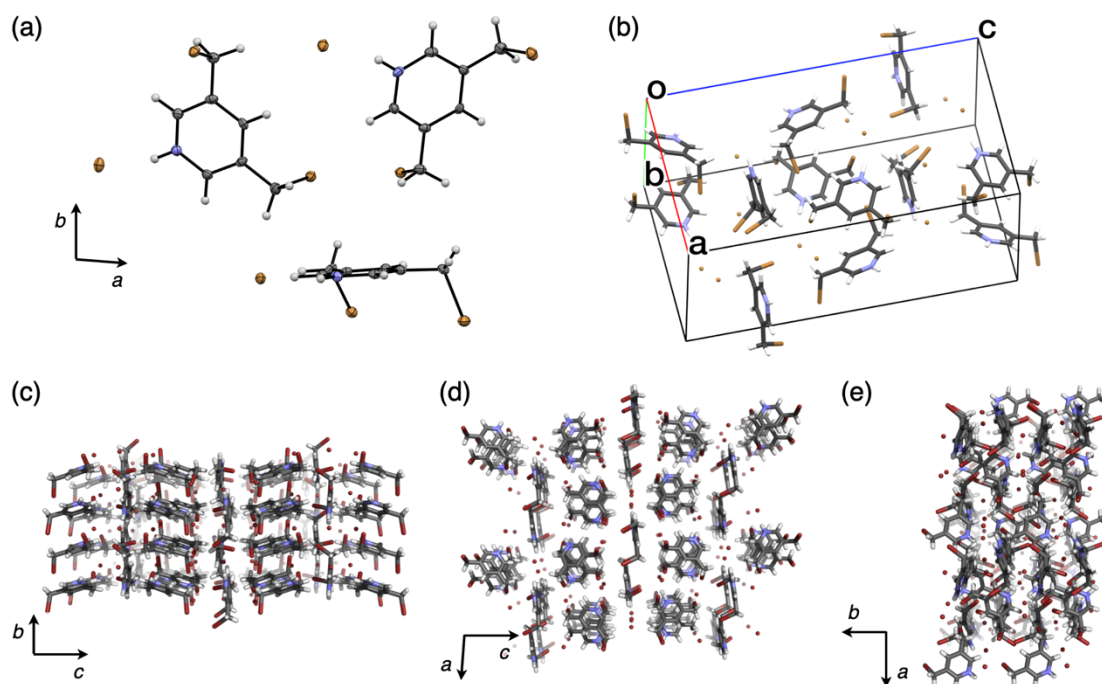

**Fig. S13** Crystal structure of BBMP·HBr (**III**, 93 K) obtained from  $(\text{CHCl}_2)_2$ . (a) ORTEP diagram (50% probability). (b) Unit cell structure. Packing structure seen along the (c) *a*-, (d) *b*- and (e) *c*-axes. CCDC 2124418.

### S3. VT-SCXRD analysis

#### (BBMP·HBr)<sub>2</sub>·CH<sub>2</sub>Cl<sub>2</sub>

A colourless plate crystal of (BBMP·HBr)<sub>2</sub>·CH<sub>2</sub>Cl<sub>2</sub> (0.2 × 0.1 × 0.03 mm<sup>3</sup>) was mounted on a 150-μm micro mount and irradiated with X-ray while cold N<sub>2</sub> gas was flowing at a constant temperature. After each measurement, the temperature was changed and held at that temperature for 5 to 10 min before the next measurement.

**Table S2.** Structural parameters for the (BBMP·HBr)<sub>2</sub>·CH<sub>2</sub>Cl<sub>2</sub> crystal observed at each temperature.

For all structures, the space group was orthorhombic with *Pccn*.

|                                                                                               |                                                                                     |                                                                                     |                                                                                      |                                                                                       |                                                                                       |
|-----------------------------------------------------------------------------------------------|-------------------------------------------------------------------------------------|-------------------------------------------------------------------------------------|--------------------------------------------------------------------------------------|---------------------------------------------------------------------------------------|---------------------------------------------------------------------------------------|
| Temperature / K                                                                               | 148                                                                                 | 168                                                                                 | 173                                                                                  | 178                                                                                   | 183                                                                                   |
| CCDC No.                                                                                      | 2124428                                                                             | 2124419                                                                             | 2124420                                                                              | 2124421                                                                               | 2124431                                                                               |
| <i>a</i> / Å                                                                                  | 23.3045(2)                                                                          | 23.3008(2)                                                                          | 23.3010(2)                                                                           | 23.3004(2)                                                                            | 23.3030(2)                                                                            |
| <i>b</i> / Å                                                                                  | 11.34090(10)                                                                        | 11.37200(10)                                                                        | 11.37880(10)                                                                         | 11.38610(10)                                                                          | 11.39340(10)                                                                          |
| <i>c</i> / Å                                                                                  | 8.86430(10)                                                                         | 8.87240(10)                                                                         | 8.87430(10)                                                                          | 8.87680(10)                                                                           | 8.87830(10)                                                                           |
| <i>V</i> / Å <sup>3</sup>                                                                     | 2342.78(4)                                                                          | 2350.98(4)                                                                          | 2352.91(4)                                                                           | 2355.02(4)                                                                            | 2357.19(4)                                                                            |
| <i>R</i> <sub>int</sub>                                                                       | 0.0280                                                                              | 0.0268                                                                              | 0.0331                                                                               | 0.0290                                                                                | 0.0358                                                                                |
| <i>R</i> <sub>1</sub> ( <i>I</i> > 2σ( <i>I</i> ))                                            | 0.0346                                                                              | 0.0356                                                                              | 0.0397                                                                               | 0.0377                                                                                | 0.0446                                                                                |
| <i>wR</i> <sub>2</sub> (All data)                                                             | 0.0993                                                                              | 0.0992                                                                              | 0.1090                                                                               | 0.1052                                                                                | 0.1272                                                                                |
| GOF                                                                                           | 1.053                                                                               | 1.077                                                                               | 1.086                                                                                | 1.062                                                                                 | 1.117                                                                                 |
| Occ. of <i>V</i> -CH <sub>2</sub> Cl <sub>2</sub> / %                                         | 100                                                                                 | 70                                                                                  | 65                                                                                   | 58                                                                                    | 50                                                                                    |
| Occ. of <i>A</i> -CH <sub>2</sub> Cl <sub>2</sub> / %                                         | 0                                                                                   | 30                                                                                  | 35                                                                                   | 42                                                                                    | 50                                                                                    |
| Electron density map of a CH <sub>2</sub> Cl <sub>2</sub> molecule (> 1.50 e/Å <sup>3</sup> ) | 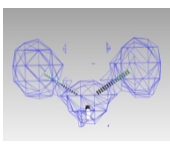 |  |  |  |  |

|                                                                                                 |                                                                                    |                                                                                    |                                                                                     |                                                                                      |                                                                                      |
|-------------------------------------------------------------------------------------------------|------------------------------------------------------------------------------------|------------------------------------------------------------------------------------|-------------------------------------------------------------------------------------|--------------------------------------------------------------------------------------|--------------------------------------------------------------------------------------|
| Temperature / K                                                                                 | 188                                                                                | 193                                                                                | 198                                                                                 | 223                                                                                  | 293                                                                                  |
| CCDC No.                                                                                        | 2124413                                                                            | 2124412                                                                            | 2124415                                                                             | 2124414                                                                              | 2124417                                                                              |
| $a / \text{\AA}$                                                                                | 23.3000(2)                                                                         | 23.2933(3)                                                                         | 23.3007(2)                                                                          | 23.3051(2)                                                                           | 23.3401(4)                                                                           |
| $b / \text{\AA}$                                                                                | 11.40130(10)                                                                       | 11.40910(10)                                                                       | 11.41420(10)                                                                        | 11.43370(10)                                                                         | 11.5126(2)                                                                           |
| $c / \text{\AA}$                                                                                | 8.88100(10)                                                                        | 8.88390(10)                                                                        | 8.88690(10)                                                                         | 8.89090(10)                                                                          | 8.92070(10)                                                                          |
| $V / \text{\AA}^3$                                                                              | 2359.24(4)                                                                         | 2360.95(5)                                                                         | 2363.55(4)                                                                          | 2369.10(4)                                                                           | 2397.04(6)                                                                           |
| $R_{\text{int}}$                                                                                | 0.0369                                                                             | 0.0246                                                                             | 0.0347                                                                              | 0.0367                                                                               | 0.0217                                                                               |
| $R_1 (I > 2\sigma(I))$                                                                          | 0.0542                                                                             | 0.0375                                                                             | 0.0431                                                                              | 0.0424                                                                               | 0.0393                                                                               |
| $wR_2$ (All data)                                                                               | 0.1577                                                                             | 0.1058                                                                             | 0.1237                                                                              | 0.1192                                                                               | 0.1085                                                                               |
| GOF                                                                                             | 1.101                                                                              | 1.064                                                                              | 1.061                                                                               | 1.072                                                                                | 1.075                                                                                |
| Occ. of $V\text{-CH}_2\text{Cl}_2 / \%$                                                         | 44                                                                                 | 35                                                                                 | 35                                                                                  | 0                                                                                    | 0                                                                                    |
| Occ. of $A\text{-CH}_2\text{Cl}_2 / \%$                                                         | 56                                                                                 | 65                                                                                 | 65                                                                                  | 100                                                                                  | 100                                                                                  |
| Electron density map of a $\text{CH}_2\text{Cl}_2$ molecule ( $> 1.50 \text{ e}/\text{\AA}^3$ ) | 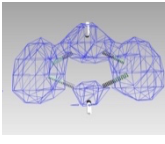 |  |  |  |  |

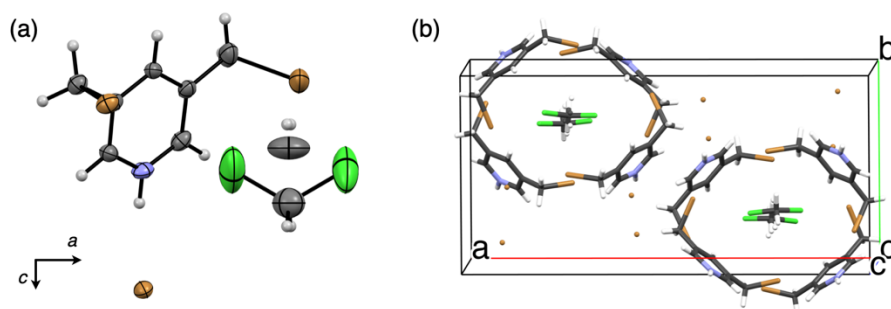

**Fig. S14** Crystal structure of  $(\text{BBMP}\cdot\text{HBr})_2\cdot 2\text{CH}_2\text{Cl}_2$  (168 K). (a) ORTEP diagram (50% probability). (b) Unit cell structure. CCDC 2124419.

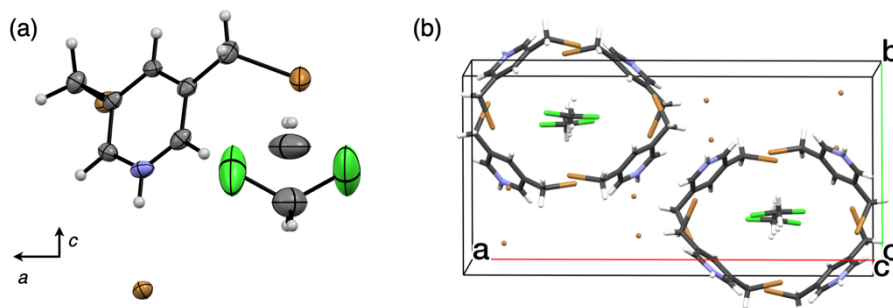

**Fig. S15** Crystal structure of  $(\text{BBMP}\cdot\text{HBr})_2\cdot 2\text{CH}_2\text{Cl}_2$  (173 K). (a) ORTEP diagram (50% probability).

(b) Unit cell structure. CCDC 2124420.

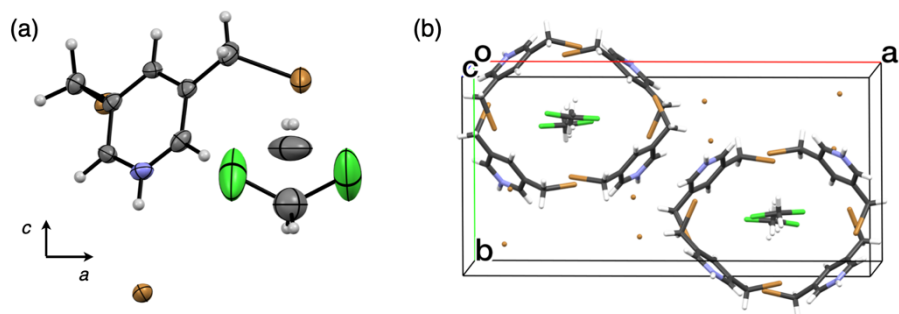

**Fig. S16** Crystal structure of (BBMP·HBr)<sub>2</sub>·2CH<sub>2</sub>Cl<sub>2</sub> (178 K). (a) ORTEP diagram (50% probability).

(b) Unit cell structure. CCDC 2124421.

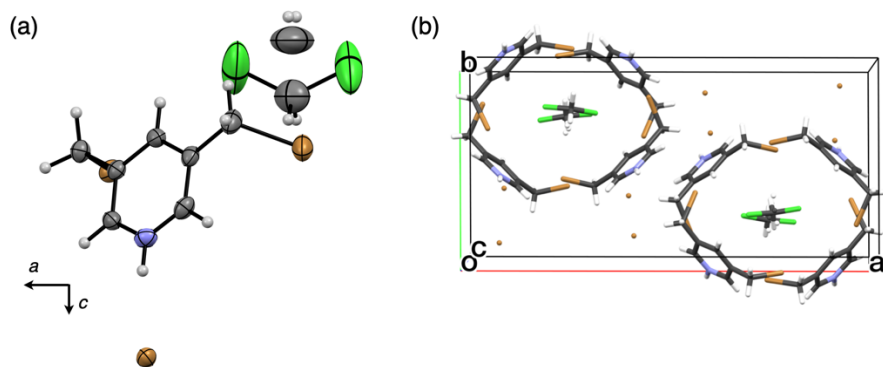

**Fig. S17** Crystal structure of (BBMP·HBr)<sub>2</sub>·2CH<sub>2</sub>Cl<sub>2</sub> (183 K). (a) ORTEP diagram (50% probability).

(b) Unit cell structure. CCDC 2124431.

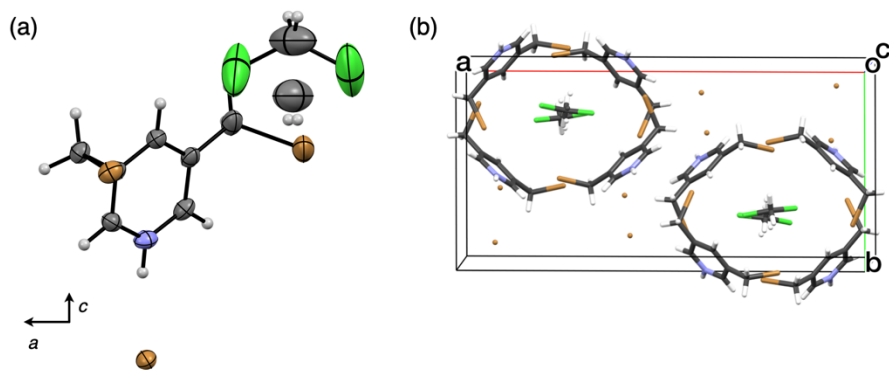

**Fig. S18** Crystal structure of (BBMP·HBr)<sub>2</sub>·2CH<sub>2</sub>Cl<sub>2</sub> (188 K). (a) ORTEP diagram (50% probability).

(b) Unit cell structure. CCDC 2124413.

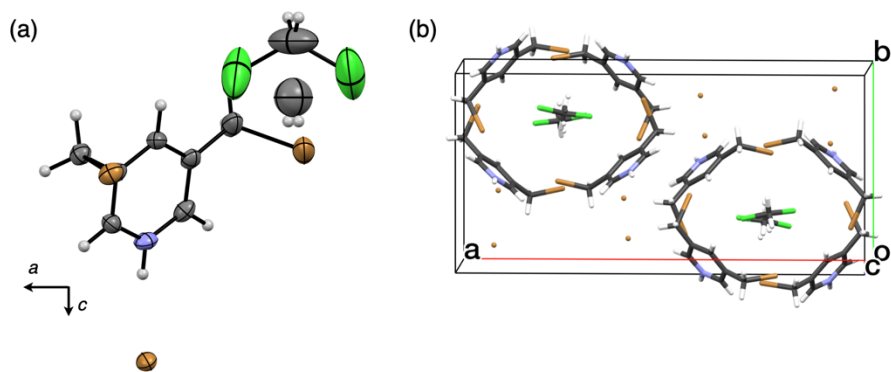

**Fig. S19** Crystal structure of  $(\text{BBMP}\cdot\text{HBr})_2\cdot\text{CH}_2\text{Cl}_2$  (193 K). (a) ORTEP diagram (50% probability).  
 (b) Unit cell structure. CCDC 2124412.

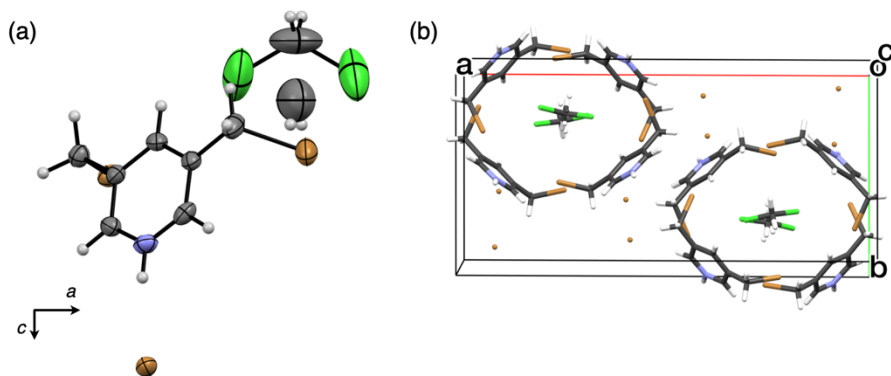

**Fig. S20** Crystal structure of  $(\text{BBMP}\cdot\text{HBr})_2\cdot\text{CH}_2\text{Cl}_2$  (198 K). (a) ORTEP diagram (50% probability).  
 (b) Unit cell structure. CCDC 2124415.

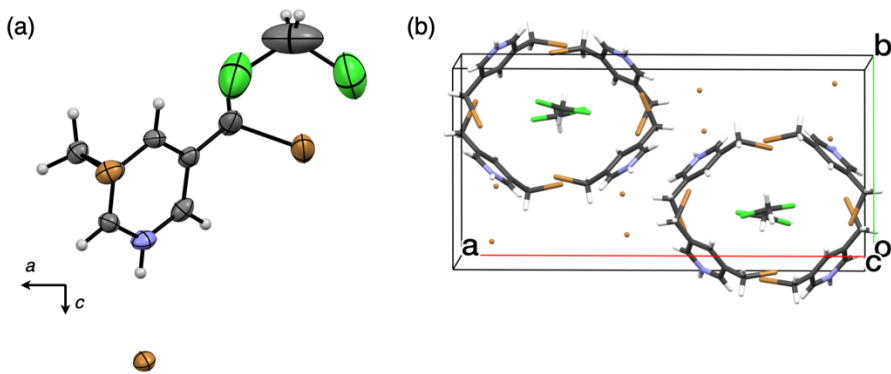

**Fig. S21** Crystal structure of  $(\text{BBMP}\cdot\text{HBr})_2\cdot\text{CH}_2\text{Cl}_2$  (223 K). (a) ORTEP diagram (50% probability).  
 (b) Unit cell structure. CCDC 2124414.

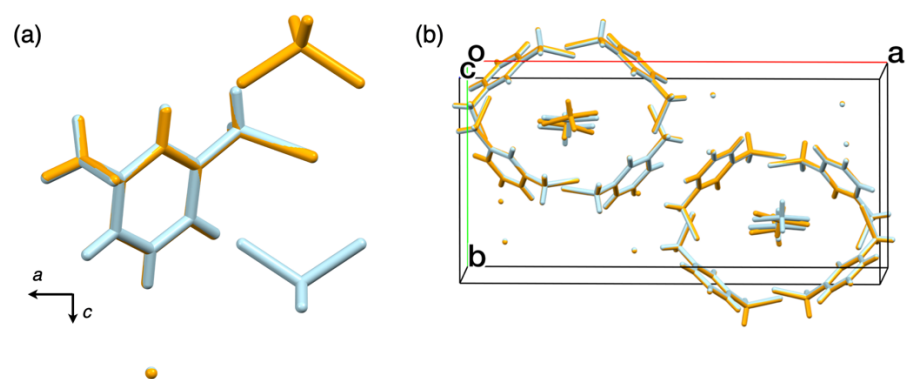

**Fig. S22** Overlaid crystal structures of  $(\text{BBMP}\cdot\text{HBr})_2\cdot\text{CH}_2\text{Cl}_2$  at 148 K (cyan) and 223 K (orange). (a) Stick model of the molecules. (b) Unit cell structures.

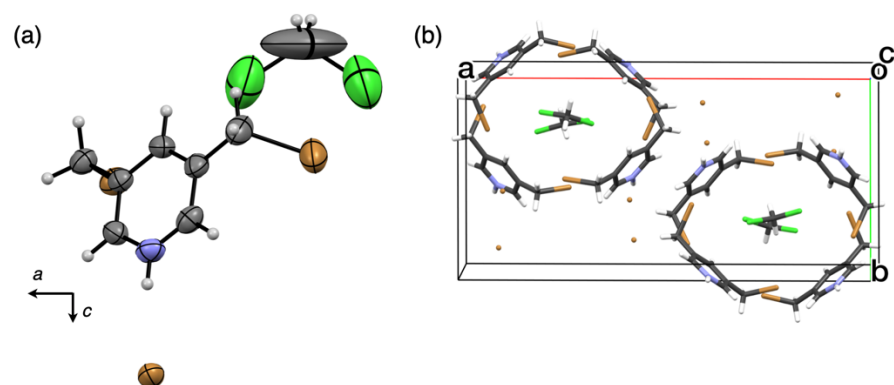

**Fig. S23** Crystal structure of  $(\text{BBMP}\cdot\text{HBr})_2\cdot\text{CH}_2\text{Cl}_2$  (293 K). (a) ORTEP diagram (50% probability). (b) Unit cell structure. CCDC 2124417.



### BBMP·HBr $\rightarrow$ CD<sub>2</sub>Cl<sub>2</sub>

A colourless plate crystal of (BBMP·HBr)<sub>2</sub> $\rightarrow$ CD<sub>2</sub>Cl<sub>2</sub> (0.35  $\times$  0.18  $\times$  0.05 mm<sup>3</sup>) was mounted on a 150- $\mu$ m micro mount and irradiated with X-ray while cold N<sub>2</sub> gas was flowing at a constant temperature. After each measurement, the temperature was changed and held at that temperature for 5 to 10 min before the next measurement.

**Table S3.** Structural parameters for the (BBMP·HBr)<sub>2</sub> $\rightarrow$ CD<sub>2</sub>Cl<sub>2</sub> crystal observed at each temperature. For the structures, the space group was orthorhombic with *Pccn*.

| Temperature / K                                                                               | 148                                                                                 | 193                                                                                 | 198                                                                                  | 203                                                                                   | 223                                                                                   |
|-----------------------------------------------------------------------------------------------|-------------------------------------------------------------------------------------|-------------------------------------------------------------------------------------|--------------------------------------------------------------------------------------|---------------------------------------------------------------------------------------|---------------------------------------------------------------------------------------|
| CCDC No.                                                                                      | 2124427                                                                             | 2124425                                                                             | 2124426                                                                              | 2124423                                                                               | 2124424                                                                               |
| <i>a</i> / Å                                                                                  | 23.3143(5)                                                                          | 23.3229(4)                                                                          | 23.3143(4)                                                                           | 23.3149(5)                                                                            | 23.3005(4)                                                                            |
| <i>b</i> / Å                                                                                  | 11.3349(3)                                                                          | 11.38030(19)                                                                        | 11.3889(2)                                                                           | 11.3966(3)                                                                            | 11.4213(2)                                                                            |
| <i>c</i> / Å                                                                                  | 8.8651(2)                                                                           | 8.87309(14)                                                                         | 8.8730(2)                                                                            | 8.87109(18)                                                                           | 8.8820(2)                                                                             |
| <i>V</i> / Å <sup>3</sup>                                                                     | 2342.74(10)                                                                         | 2355.11(7)                                                                          | 2356.00(8)                                                                           | 2357.14(9)                                                                            | 2363.70(8)                                                                            |
| <i>R</i> <sub>int</sub>                                                                       | 0.0567                                                                              | 0.0527                                                                              | 0.0575                                                                               | 0.0769                                                                                | 0.0726                                                                                |
| <i>R</i> <sub>1</sub> ( <i>I</i> > 2σ( <i>I</i> ))                                            | 0.0552                                                                              | 0.0560                                                                              | 0.0610                                                                               | 0.0928                                                                                | 0.0811                                                                                |
| <i>wR</i> <sub>2</sub> (All data)                                                             | 0.1598                                                                              | 0.1576                                                                              | 0.1826                                                                               | 0.2658                                                                                | 0.2321                                                                                |
| GOF                                                                                           | 1.095                                                                               | 1.070                                                                               | 1.066                                                                                | 1.160                                                                                 | 1.060                                                                                 |
| Occ. of <i>V</i> -CD <sub>2</sub> Cl <sub>2</sub> / %                                         | 100                                                                                 | 77                                                                                  | 55                                                                                   | 26                                                                                    | 0                                                                                     |
| Occ. of <i>A</i> -CD <sub>2</sub> Cl <sub>2</sub> / %                                         | 0                                                                                   | 23                                                                                  | 45                                                                                   | 74                                                                                    | 100                                                                                   |
| Electron density map of a CD <sub>2</sub> Cl <sub>2</sub> molecule (> 1.50 e/Å <sup>3</sup> ) | 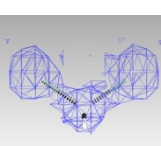 |  |  |  |  |

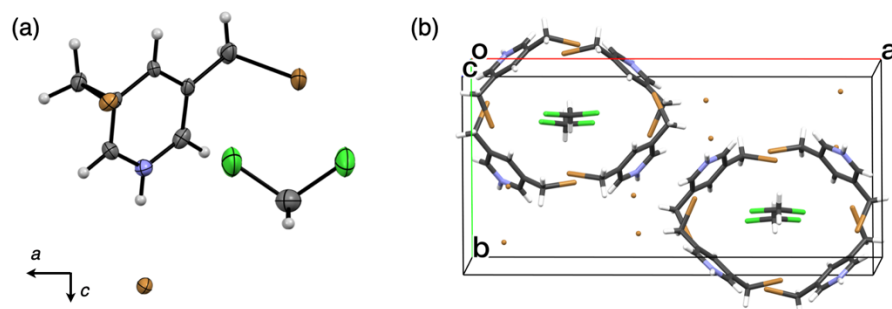

**Fig. S24** Crystal structure of (BBMP·HBr)<sub>2</sub> $\rightarrow$ CD<sub>2</sub>Cl<sub>2</sub> (148 K). (a) ORTEP diagram (50% probability). (b) Unit cell structure. CCDC 2124427.

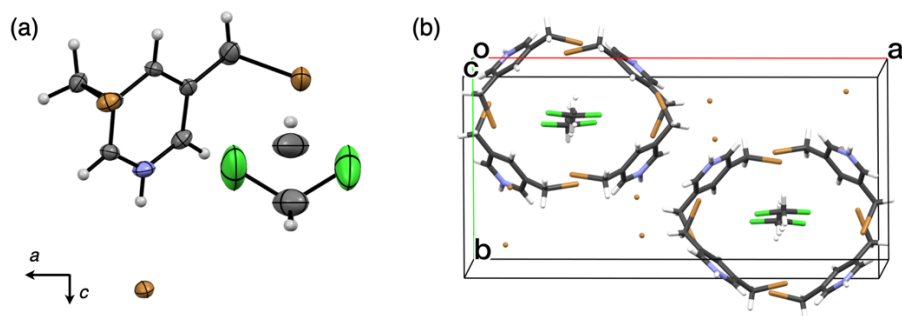

**Fig. S25** Crystal structure of  $(\text{BBMP}\cdot\text{HBr})_2\cdot 2\text{CD}_2\text{Cl}_2$  (193 K). (a) ORTEP diagram (50% probability). (b) Unit cell structure. CCDC 2124425.

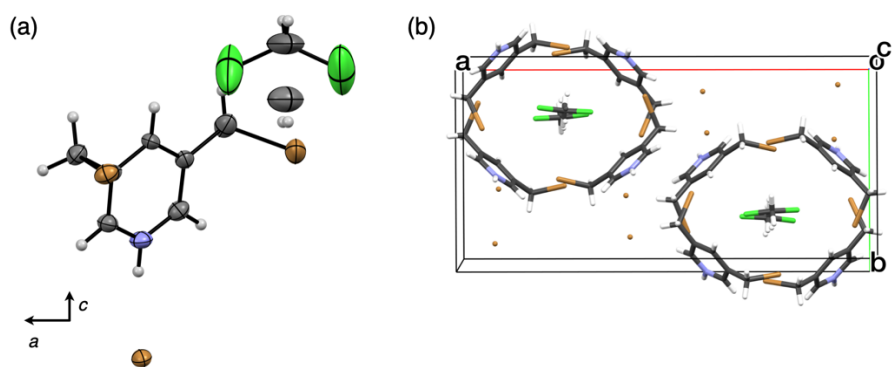

**Fig. S26** Crystal structure of  $(\text{BBMP}\cdot\text{HBr})_2\cdot 2\text{CD}_2\text{Cl}_2$  (198 K). (a) ORTEP diagram (50% probability). (b) Unit cell structure. CCDC 2124426.

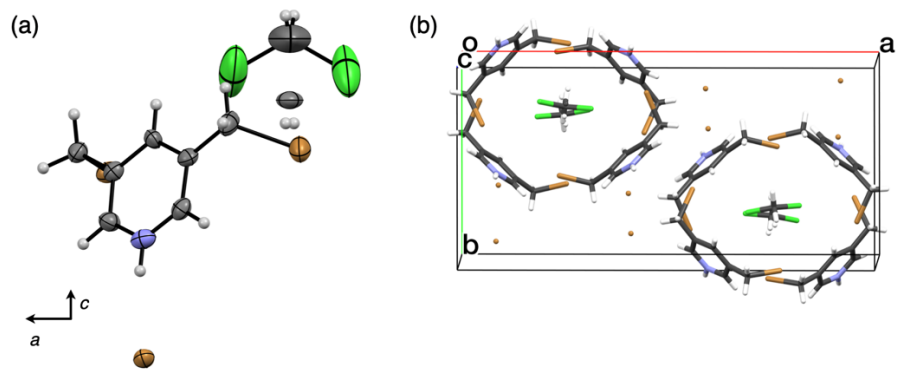

**Fig. S27** Crystal structure of  $(\text{BBMP}\cdot\text{HBr})_2\cdot 2\text{CD}_2\text{Cl}_2$  (203 K). (a) ORTEP diagram (50% probability). (b) Unit cell structure. CCDC 2124423.

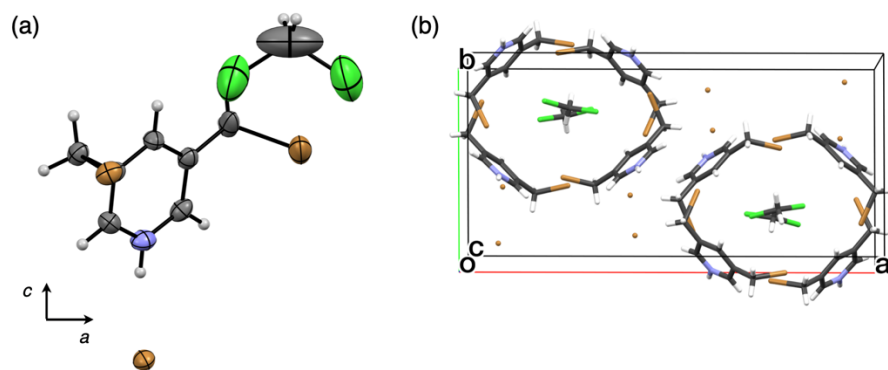

**Fig. S28** Crystal structure of (BBMP·HBr)<sub>2</sub>·CD<sub>2</sub>Cl<sub>2</sub> (223 K). (a) ORTEP diagram (50% probability). (b) Unit cell structure. CCDC 2124424.

### BBMP·HBr $\cdot$ CH<sub>2</sub>Br<sub>2</sub>

A colourless plate crystal of (BBMP·HBr)<sub>2</sub>·CH<sub>2</sub>Br<sub>2</sub> (0.3 × 0.05 × 0.02 mm<sup>3</sup>) was mounted on a 150- $\mu$ m micro mount and irradiated with X-ray while cold N<sub>2</sub> gas was flowing at a constant temperature. After each measurement, the temperature was changed and held at that temperature for 10 min before the next measurement.

**Table S4.** Structural parameters for the (BBMP·HBr)<sub>2</sub>·CH<sub>2</sub>Br<sub>2</sub> crystal observed at each temperature.

For the structures, the space group was orthorhombic with *Pccn*.

| Temperature / K                                                                               | 148                                                                                 | 223                                                                                 | 293                                                                                  |
|-----------------------------------------------------------------------------------------------|-------------------------------------------------------------------------------------|-------------------------------------------------------------------------------------|--------------------------------------------------------------------------------------|
| CCDC No.                                                                                      | 2124430                                                                             | 2124422                                                                             | 2124429                                                                              |
| <i>a</i> / Å                                                                                  | 23.5252(4)                                                                          | 23.6012(4)                                                                          | 23.7150(8)                                                                           |
| <i>b</i> / Å                                                                                  | 11.2799(2)                                                                          | 11.3363(2)                                                                          | 11.4034(4)                                                                           |
| <i>c</i> / Å                                                                                  | 8.9163(2)                                                                           | 8.94002(15)                                                                         | 8.9608(4)                                                                            |
| <i>V</i> / Å <sup>3</sup>                                                                     | 2366.05(8)                                                                          | 2391.89(7)                                                                          | 2423.28(16)                                                                          |
| <i>R</i> <sub>int</sub>                                                                       | 0.0672                                                                              | 0.0418                                                                              | 0.0645                                                                               |
| <i>R</i> <sub>1</sub> ( <i>I</i> > 2σ( <i>I</i> ))                                            | 0.0458                                                                              | 0.0338                                                                              | 0.0576                                                                               |
| <i>wR</i> <sub>2</sub> (All data)                                                             | 0.1173                                                                              | 0.0953                                                                              | 0.2082                                                                               |
| GOF                                                                                           | 1.034                                                                               | 1.082                                                                               | 1.131                                                                                |
| Occ. of <i>V</i> -CH <sub>2</sub> Br <sub>2</sub> / %                                         | 100                                                                                 | 100                                                                                 | 100                                                                                  |
| Occ. of <i>A</i> -CH <sub>2</sub> Br <sub>2</sub> / %                                         | 0                                                                                   | 0                                                                                   | 0                                                                                    |
| Electron density map of a CH <sub>2</sub> Br <sub>2</sub> molecule (> 1.50 e/Å <sup>3</sup> ) | 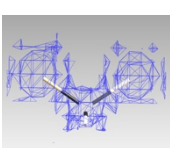 |  |  |

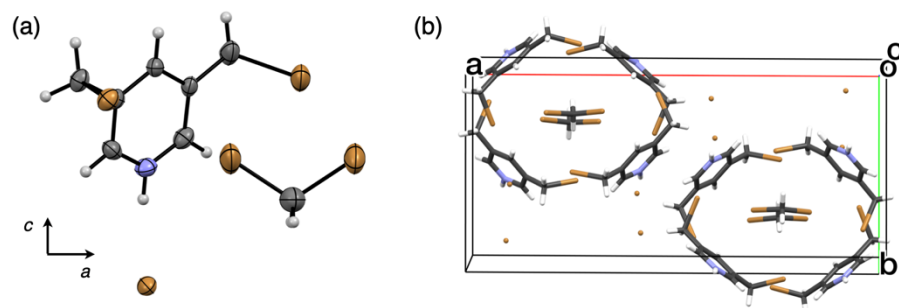

**Fig. S29** Crystal structure of (BBMP·HBr)<sub>2</sub>·CH<sub>2</sub>Br<sub>2</sub> (223 K). (a) ORTEP diagram (50% probability). (b) Unit cell structure. CCDC 2124422.

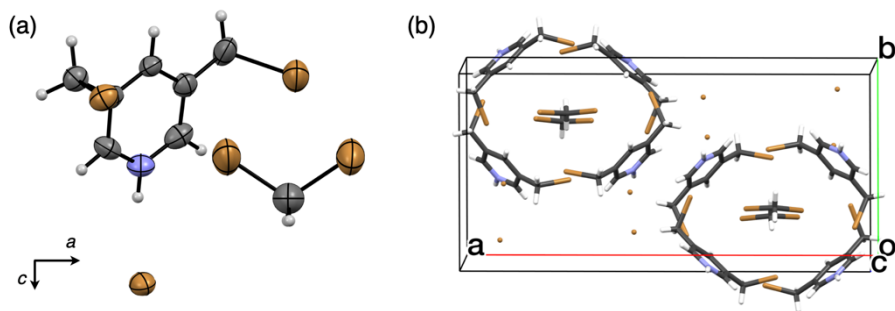

**Fig. S30** Crystal structure of  $(\text{BBMP}\cdot\text{HBr})_2\cdot\text{CH}_2\text{Br}_2$  (293 K). (a) ORTEP diagram (50% probability). (b) Unit cell structure. CCDC 2124429.

#### S4. References

- 1 A.-M. Fuller, D. A. Leigh, P. J. Lusby, I. D. H. Oswald, S. Parsons and D. B. Walker, *Angew. Chem. Int. Ed.*, 2004, **43**, 3914–3918.
- 2 F. Xue, J. Fang, S. L. Delker, H. Li, P. Martíásek, L. J. Roman, T. L. Poulos and R. B. Silverman, *J. Med. Chem.*, 2011, **54**, 2039–2048.
- 3 S. Monmoton, H. Lefebvre, F. Costa-Torro and A. Fradet, *Macromol. Chem. Phys.*, 2008, **209**, 2382–2389.
- 4 O. V. Dolomanov, L. J. Bourhis, R. J. Gildea, J. a. K. Howard and H. Puschmann, *J. Appl. Crystallogr.*, 2009, **42**, 339–341.
- 5 G. M. Sheldrick, *Acta Crystallogr. A*, 2008, **64**, 112–122.
- 6 C. B. Hübschle, G. M. Sheldrick and B. Dittrich, *J. Appl. Crystallogr.*, 2011, **44**, 1281–1284.
